# Supplementary material
Source: PubMed Central journal article supplement (PMC7109546)
Supplement: mmc1.pdf [file mmc1.pdf]

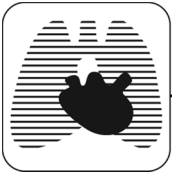

## Detection of COPD Exacerbations and Compliance With Patient-Reported Daily Symptom Diaries

*Neil W. Johnston, MSc; Kim Lambert, RN, MSc; Patricia Hussack, RN; Maria Gerhardsson de Verdier, MD, PhD; Tim Higenbottam, MD, DSc; Jonathan Lewis, BSc; Paul Newbold, PhD; Martin Jenkins, MMath; Geoffrey R. Norman, PhD; Peter V. Coyle, MD; and R. Andrew McIvor, MD*

### e-Appendix 1. BlackBerry Daily Diary Questions

Study of Cycles of Respiratory Symptoms and their Relation to Respiratory Viral Infections and other Factors in Participants with Obstructive Lung Disease

1. Did you cough today?

- No cough
- Mild cough
- Moderate cough
- Severe cough
- Very severe cough

2. Did you wheeze today?

- No wheezing
- Mild wheezing
- Moderate wheezing
- Severe wheezing
- Very severe wheezing

3. Did you cough up phlegm today?

- No
- Yes

4. Did you have breathing problems today?

- No breathing problems
- Mild breathing problems
- Moderate breathing problems
- Severe breathing problems
- Very severe breathing problems

*Online supplements are not copyedited prior to posting.*

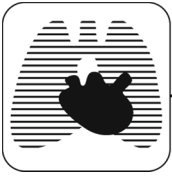

5. *Did breathing problems interfere with any of your regular activities\* today?*

- Did not interfere
- Mildly interfered
- Moderately interfered
- Severely interfered
- Prevented altogether

*\*Such as working, walking, hobbies, meeting friends, shopping, or family visits*

6. *Have you had any of the symptoms of a cold or flu shown below today?*

- No
- Yes

*Runny/stuffy nose, change in phlegm colour or stickiness, sore throat, fever, shivers, chest congestion?*

7. *Did you see a Doctor or Nurse today for breathing problems or a cold?*

- No
- Yes

8. *Is there anything that you'd like the study team to contact you about?*

- No
- Yes

### Supplementary Questions Added to the Daily Diary When and Exacerbation was Confirmed

1. *Did you take prednisone today?*

- No
- Yes

2. *Did you take an antibiotic today?*

- No
- Yes

3. *Do you think your breathing is back to normal today?*

- No
- Yes
- Don't know

*You've filled in the diary x% of the study days. Please keep up the good work. It is much appreciated.*

*Online supplements are not copyedited prior to posting.*



### **e-Appendix 2. Recruitment of subjects and reasons for exclusion**

December 2007 to November 2008

166 candidates referred by primary care and specialist physicians

|                                          |     |
|------------------------------------------|-----|
| Refused to participate*                  | 65  |
| Concomitant disease or insulin dependent | 10  |
| Reversibility                            | 4   |
| Ratio >70                                | 17  |
| Away for winter                          | 4   |
| <10 pack years                           | 5   |
| Visual impairment                        | 2   |
| In another study                         | 2   |
| Language barrier                         | 2   |
| Daily prednisone                         | 2   |
| Asthmatic                                | 1   |
| Moving afar                              | 2   |
| Recruited                                | 50  |
| Total                                    | 166 |

\*REB policies preclude soliciting further information from study candidates who refuse to participate

December 2007 to November 2008

141 candidates referred by primary care and specialist physicians

|                     |     |
|---------------------|-----|
| Refused*            | 66  |
| Concomitant disease | 11  |
| Reversibility       | 2   |
| Ratio >70           | 27  |
| <10 pack years      | 4   |
| Daily prednisone    | 1   |
| Recruited           | 30  |
| Total               | 141 |

\*REB policies preclude soliciting further information from study candidates who refuse to participate

*Online supplements are not copyedited prior to posting.*



e-Table 1.

| Year | Week | COPD-40PL-wkAvg |
|------|------|-----------------|
| 2001 | 13   | 151             |
| 2001 | 14   | 170.8571429     |
| 2001 | 15   | 165.4285714     |
| 2001 | 16   | 173.8571429     |
| 2001 | 17   | 165.7142857     |
| 2001 | 18   | 167.7142857     |
| 2001 | 19   | 145.5714286     |
| 2001 | 20   | 154.7142857     |
| 2001 | 21   | 151.4285714     |
| 2001 | 22   | 137.8571429     |
| 2001 | 23   | 150.8571429     |
| 2001 | 24   | 153.2857143     |
| 2001 | 25   | 134.7142857     |
| 2001 | 26   | 135.5714286     |
| 2001 | 27   | 136.5714286     |
| 2001 | 28   | 112.1428571     |
| 2001 | 29   | 110.4285714     |
| 2001 | 30   | 104.7142857     |
| 2001 | 31   | 107.7142857     |
| 2001 | 32   | 123.4285714     |
| 2001 | 33   | 110.8571429     |
| 2001 | 34   | 95.85714286     |
| 2001 | 35   | 99.14285714     |
| 2001 | 36   | 116.5714286     |
| 2001 | 37   | 105.4285714     |
| 2001 | 38   | 123.7142857     |
| 2001 | 39   | 150.1428571     |
| 2001 | 40   | 171.7142857     |
| 2001 | 41   | 182.2857143     |
| 2001 | 42   | 162.8571429     |
| 2001 | 43   | 150.8571429     |
| 2001 | 44   | 136.2857143     |
| 2001 | 45   | 144.2857143     |
| 2001 | 46   | 147.1428571     |
| 2001 | 47   | 139             |
| 2001 | 48   | 130.5714286     |
| 2001 | 49   | 143.4285714     |
| 2001 | 50   | 149.8571429     |
| 2001 | 51   | 158.1428571     |
| 2001 | 52   | 235.125         |
| 2002 | 1    | 222.8571429     |

*Online supplements are not copyedited prior to posting.*



|      |    |             |
|------|----|-------------|
| 2002 | 2  | 175         |
| 2002 | 3  | 145.1428571 |
| 2002 | 4  | 147.1428571 |
| 2002 | 5  | 139.2857143 |
| 2002 | 6  | 161.4285714 |
| 2002 | 7  | 162.5714286 |
| 2002 | 8  | 183.8571429 |
| 2002 | 9  | 177.2857143 |
| 2002 | 10 | 180.2857143 |
| 2002 | 11 | 182.1428571 |
| 2002 | 12 | 169         |
| 2002 | 13 | 175.4285714 |
| 2002 | 14 | 169.4285714 |
| 2002 | 15 | 165.8571429 |
| 2002 | 16 | 163.7142857 |
| 2002 | 17 | 142.7142857 |
| 2002 | 18 | 146.2857143 |
| 2002 | 19 | 149.1428571 |
| 2002 | 20 | 158.8571429 |
| 2002 | 21 | 163.8571429 |
| 2002 | 22 | 148.1428571 |
| 2002 | 23 | 138.4285714 |
| 2002 | 24 | 128.7142857 |
| 2002 | 25 | 136.7142857 |
| 2002 | 26 | 146.8571429 |
| 2002 | 27 | 150.2857143 |
| 2002 | 28 | 139.8571429 |
| 2002 | 29 | 136         |
| 2002 | 30 | 126.8571429 |
| 2002 | 31 | 120         |
| 2002 | 32 | 125.2857143 |
| 2002 | 33 | 116.5714286 |
| 2002 | 34 | 103.7142857 |
| 2002 | 35 | 113.8571429 |
| 2002 | 36 | 115.1428571 |
| 2002 | 37 | 118.8571429 |
| 2002 | 38 | 129.5714286 |
| 2002 | 39 | 135.1428571 |
| 2002 | 40 | 147.7142857 |
| 2002 | 41 | 150.8571429 |
| 2002 | 42 | 164.1428571 |
| 2002 | 43 | 144.8571429 |

*Online supplements are not copyedited prior to posting.*



|      |    |             |
|------|----|-------------|
| 2002 | 44 | 142.7142857 |
| 2002 | 45 | 147.2857143 |
| 2002 | 46 | 151         |
| 2002 | 47 | 141.5714286 |
| 2002 | 48 | 138.8571429 |
| 2002 | 49 | 148.5714286 |
| 2002 | 50 | 161.7142857 |
| 2002 | 51 | 176.2857143 |
| 2002 | 52 | 262.5       |
| 2003 | 1  | 228.8571429 |
| 2003 | 2  | 148.5714286 |
| 2003 | 3  | 132.2857143 |
| 2003 | 4  | 118.7142857 |
| 2003 | 5  | 132.7142857 |
| 2003 | 6  | 137.2857143 |
| 2003 | 7  | 140         |
| 2003 | 8  | 151.8571429 |
| 2003 | 9  | 168.4285714 |
| 2003 | 10 | 167.5714286 |
| 2003 | 11 | 194.1428571 |
| 2003 | 12 | 205.5714286 |
| 2003 | 13 | 157.7142857 |
| 2003 | 14 | 127.8571429 |
| 2003 | 15 | 135         |
| 2003 | 16 | 132.1428571 |
| 2003 | 17 | 128.7142857 |
| 2003 | 18 | 125.2857143 |
| 2003 | 19 | 119.5714286 |
| 2003 | 20 | 131.5714286 |
| 2003 | 21 | 123.2857143 |
| 2003 | 22 | 130.7142857 |
| 2003 | 23 | 130         |
| 2003 | 24 | 130.7142857 |
| 2003 | 25 | 123.7142857 |
| 2003 | 26 | 129.7142857 |
| 2003 | 27 | 124.8571429 |
| 2003 | 28 | 108         |
| 2003 | 29 | 102.2857143 |
| 2003 | 30 | 104.7142857 |
| 2003 | 31 | 115.1428571 |
| 2003 | 32 | 105.1428571 |
| 2003 | 33 | 119         |





|      |    |             |
|------|----|-------------|
| 2003 | 34 | 103.4285714 |
| 2003 | 35 | 111         |
| 2003 | 36 | 106.8571429 |
| 2003 | 37 | 125.8571429 |
| 2003 | 38 | 130.2857143 |
| 2003 | 39 | 149.8571429 |
| 2003 | 40 | 157.1428571 |
| 2003 | 41 | 165.7142857 |
| 2003 | 42 | 157.1428571 |
| 2003 | 43 | 137.1428571 |
| 2003 | 44 | 145.5714286 |
| 2003 | 45 | 145.5714286 |
| 2003 | 46 | 151.7142857 |
| 2003 | 47 | 158.4285714 |
| 2003 | 48 | 157.8571429 |
| 2003 | 49 | 180.4285714 |
| 2003 | 50 | 210.1428571 |
| 2003 | 51 | 272.5714286 |
| 2003 | 52 | 380.125     |
| 2004 | 1  | 300.2857143 |
| 2004 | 2  | 171.1428571 |
| 2004 | 3  | 139.2857143 |
| 2004 | 4  | 117.4285714 |
| 2004 | 5  | 137         |
| 2004 | 6  | 147.5714286 |
| 2004 | 7  | 151.2857143 |
| 2004 | 8  | 160.2857143 |
| 2004 | 9  | 181         |
| 2004 | 10 | 194.2857143 |
| 2004 | 11 | 181         |
| 2004 | 12 | 182         |
| 2004 | 13 | 195.8571429 |
| 2004 | 14 | 209.7142857 |
| 2004 | 15 | 214         |
| 2004 | 16 | 221         |
| 2004 | 17 | 185.8571429 |
| 2004 | 18 | 183.2857143 |
| 2004 | 19 | 186         |
| 2004 | 20 | 167.8571429 |
| 2004 | 21 | 171.2857143 |
| 2004 | 22 | 160.1428571 |
| 2004 | 23 | 166.4285714 |



|      |    |             |
|------|----|-------------|
| 2004 | 24 | 152.2857143 |
| 2004 | 25 | 126.8571429 |
| 2004 | 26 | 132.5714286 |
| 2004 | 27 | 140.7142857 |
| 2004 | 28 | 130.1428571 |
| 2004 | 29 | 123.2857143 |
| 2004 | 30 | 112.8571429 |
| 2004 | 31 | 126.1428571 |
| 2004 | 32 | 119.5714286 |
| 2004 | 33 | 117.5714286 |
| 2004 | 34 | 119.7142857 |
| 2004 | 35 | 134.7142857 |
| 2004 | 36 | 147.5714286 |
| 2004 | 37 | 134.2857143 |
| 2004 | 38 | 142.7142857 |
| 2004 | 39 | 161.7142857 |
| 2004 | 40 | 173.5714286 |
| 2004 | 41 | 191.4285714 |
| 2004 | 42 | 173.2857143 |
| 2004 | 43 | 158.5714286 |
| 2004 | 44 | 160.375     |
| 2004 | 45 | 162.7142857 |
| 2004 | 46 | 152.1428571 |
| 2004 | 47 | 169         |
| 2004 | 48 | 160.1666667 |
| 2004 | 49 | 160.4285714 |
| 2004 | 50 | 156.5714286 |
| 2004 | 51 | 184.7142857 |
| 2004 | 52 | 306.75      |

*Online supplements are not copyedited prior to posting.*
